# Supplementary material
Source: PubMed Central journal article supplement (PMC2669030)

## Supplementary Information

**Supplemental Figure S1.** Loss of some Paf1C components reduces [*PSI*<sup>+</sup>]-mediated nonsense suppression. Deletions of *RTF1*, *CDC73*, and *LEO1* were made in the following strains: strong (s) [*PSI*<sup>+</sup>], weak (w) [*PSI*<sup>+</sup>], [*psi*<sup>-</sup>], and SV16. Each deletion mutant and parental wild type control strain was spotted as described in the legend of Figure 3.

**Supplemental Figure S2.** Deletion of *CTR9* results in reduced nonsense suppression in the OT69 strain harboring a mutation in *sup45* (E415X). Liquid cultures were normalized to equal cell density and five-fold serial dilutions were spotted onto YPD and SD-ade medium. Deletion of *CTR9* was confirmed by colony PCR and western blot.



Supplementary Figure S2

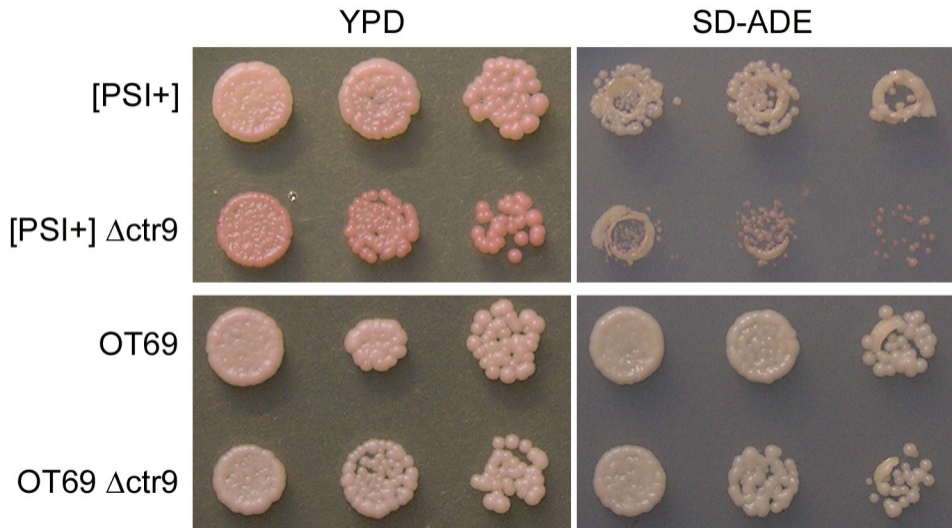

Supplement: E08-08-0813_1.pdf [file E08-08-0813_1.pdf]
